# Supplementary material for: Beyond the Wild MRSA: Genetic Features and Phylogenomic Review of mecC-Mediated Methicillin Resistance in Non-aureus Staphylococci and Mammaliicocci
Source: MDPI journal article supplement (doi:10.3390/microorganisms12010066), 2023-12-29
Supplement: s1 [file s1]

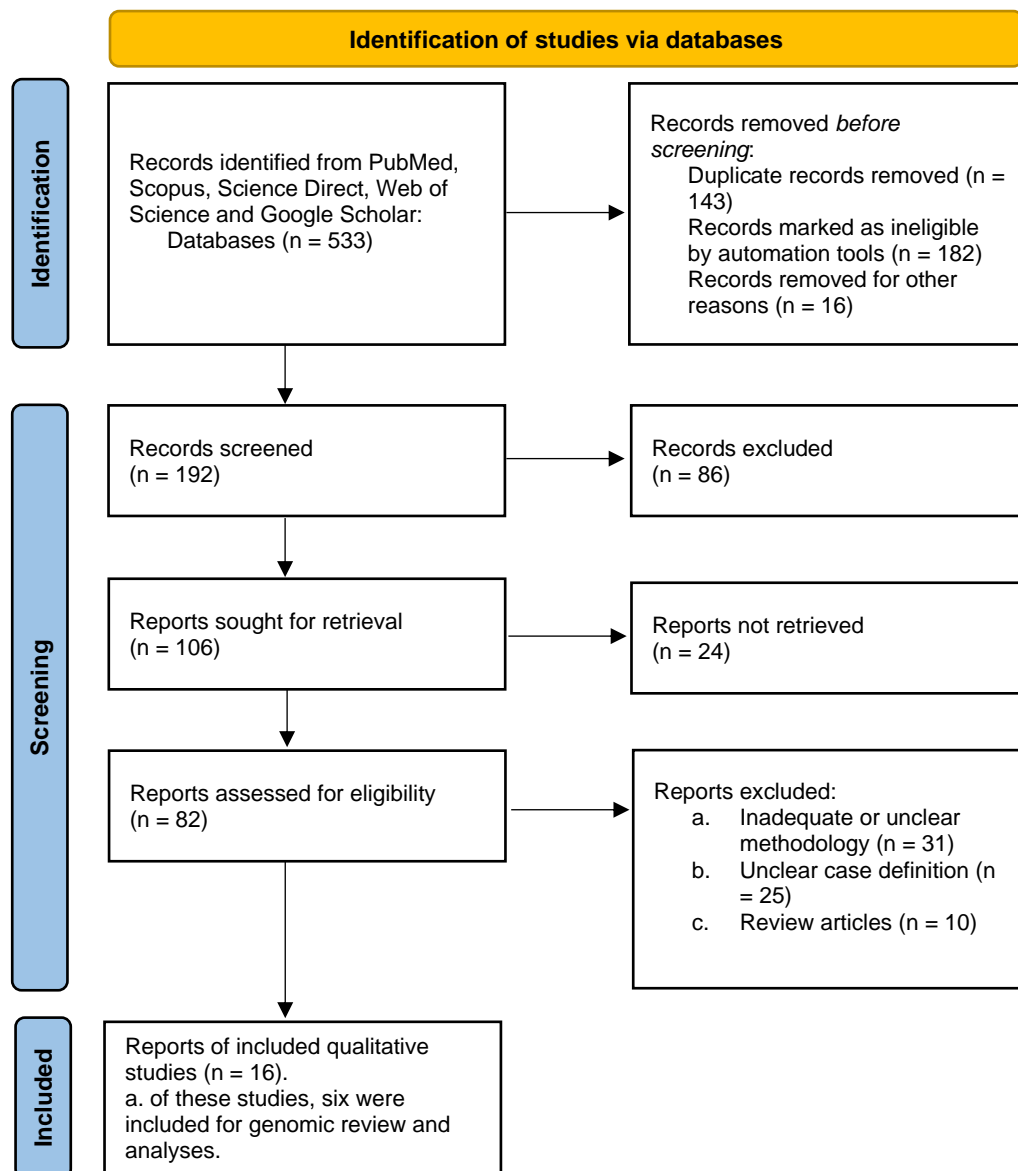

**Figure S1.** Identification and selection flowchart of articles on the *mecC*-carrying non-*aureus* staphylococci and mammaliicocci
