# Supplementary material for: Beyond the Wild MRSA: Genetic Features and Phylogenomic Review of mecC-Mediated Methicillin Resistance in Non-aureus Staphylococci and Mammaliicocci
Source: Microorganisms. 2023 Dec 29;12(1):66. doi: 10.3390/microorganisms12010066 (PMC10818522; doi:10.3390/microorganisms12010066)
Supplement: Supplementary file 1 [file microorganisms-12-00066-s001.zip › Supplementary Table S1.xlsx]

## Sheet: mecC matrix
Table S1: SNPs matrix of 17 genomes of mecC-carrying non-aureus staphyococci and mammaliiococci
	ERR3350388/1-2243	GCA_002614725.1/1-2243	GCA_030012825.1/1-2243	GCA_030012925.1/1-2243	GCA_030012945.1/1-2243	GCA_030013965.1/1-2243	GCA_030250065.1/1-2243	GCA_030250115.1/1-2243	GCA_900098615.1/1-2243	GCF_030012825.1/1-2243	reference/1-2243	SRR20693382/1-2243	SRR20693383/1-2243	SRR20693384/1-2243	SRR20693403/1-2243	SRR20693405/1-2243	SRR8494495/1-2243	SRR8494496/1-2243	SRR8494497/1-2243
ERR3350388/1-2243	0	1147	545	545	545	545	177	173	1143	545	956	168	167	167	168	168	1471	1096	167
GCA_002614725.1/1-2243	1147	0	1185	1185	1185	1185	1165	1167	419	1185	785	1172	1171	1171	1172	1172	784	822	1174
GCA_030012825.1/1-2243	545	1185	0	0	0	0	473	477	1198	0	1085	475	474	474	476	476	1494	1165	474
GCA_030012925.1/1-2243	545	1185	0	0	0	0	473	477	1198	0	1085	475	474	474	476	476	1494	1165	474
GCA_030012945.1/1-2243	545	1185	0	0	0	0	473	477	1198	0	1085	475	474	474	476	476	1494	1165	474
GCA_030013965.1/1-2243	545	1185	0	0	0	0	473	477	1198	0	1085	475	474	474	476	476	1494	1165	474
GCA_030250065.1/1-2243	177	1165	473	473	473	473	0	4	1183	473	1045	37	36	36	37	37	1473	1140	38
GCA_030250115.1/1-2243	173	1167	477	477	477	477	4	0	1187	477	1049	33	32	32	33	33	1469	1144	34
GCA_900098615.1/1-2243	1143	419	1198	1198	1198	1198	1183	1187	0	1198	777	1192	1191	1191	1193	1193	503	807	1192
GCF_030012825.1/1-2243	545	1185	0	0	0	0	473	477	1198	0	1085	475	474	474	476	476	1494	1165	474
reference/1-2243	956	785	1085	1085	1085	1085	1045	1049	777	1085	0	1050	1049	1049	1051	1051	1172	584	1048
SRR20693382/1-2243	168	1172	475	475	475	475	37	33	1192	475	1050	0	1	1	4	4	1473	1150	13
SRR20693383/1-2243	167	1171	474	474	474	474	36	32	1191	474	1049	1	0	0	3	3	1472	1149	12
SRR20693384/1-2243	167	1171	474	474	474	474	36	32	1191	474	1049	1	0	0	3	3	1472	1149	12
SRR20693403/1-2243	168	1172	476	476	476	476	37	33	1193	476	1051	4	3	3	0	0	1474	1151	13
SRR20693405/1-2243	168	1172	476	476	476	476	37	33	1193	476	1051	4	3	3	0	0	1474	1151	13
SRR8494495/1-2243	1471	784	1494	1494	1494	1494	1473	1469	503	1494	1172	1473	1472	1472	1474	1474	0	1195	1475
SRR8494496/1-2243	1096	822	1165	1165	1165	1165	1140	1144	807	1165	584	1150	1149	1149	1151	1151	1195	0	1144
SRR8494497/1-2243	167	1174	474	474	474	474	38	34	1192	474	1048	13	12	12	13	13	1475	1144	0
min: 0 max: 1494
